*Bacillus thuringiensis* var. *morrisoni* strain PG14: nucleotide sequence of a gene encoding a 27kDa crystal protein

David J.Earp and David J.Ellar

Cambridge University, Department of Biochemistry, Tennis Court Road, Cambridge CB2 1QW, UK

Submitted March 30, 1987

Accession no. Y00135

Following hybridization studies using the cloned *Bacillus thuringiensis* var. *israelensis* (Bti) 27 kDa insecticidal toxin gene and *B.t.* var. *morrisoni* strain PG14 DNA (1,2), a 1.2 kb *TaqI* fragment containing a gene encoding a 27 kDa protein has been cloned from the 74MDa plasmid of PG14. The nucleotide sequence of this gene, presented below, is highly homologous to the Bti 27 kDa toxin gene (3,4), and the gene product, expressed in *E. coli*, shows cross-reaction with anti-Bti 27 kDa toxin serum. A single base-pair difference (G replacing C, arrowed), resulting in an alanine residue in PG14 rather than the proline found in Bti, distinguishes the two. Interestingly there are no "silent" substitutions, and downstream regions, including inverted repeat sequences (underlined), are conserved. The putative Shine-Dalgarno sequence is boxed.

CCACTATTCTAATTAACTGAGGAGTGTTTATTTATGAAAAATTTAAATCATTGTCCATTAGAAAGATATAAAGTAAATCCATGGAAAAACCCCTCAATC
M E N L N H C P L E D I K V M P W K T P Q S
AACAGCAAGGGTTATTACATTACCGFTTGAGGATCCAAAATGAAATCAATAATCTCTCTATTAAACGAAATGGATAATCCGAATATATATGGCAAGCA
T A R V I T L R V E D P N E I N N L L S I N E I D N P N Y I L Q A
ATTATGTTAGCAAATGCATTTCAAAATGCATTAGTCCCACTTCTACAGATTTTGGTGATGCCCTACGCTTTAGTATGGCAAAAGGTTTGAAGAAATCGCAA
I H L A N A F Q N A L V P T S T D F G D A L R F S M A K G L E I A
ACACAATFACACCGATGGGGTCTGAGTGGATATGTTGATCAAAAATGTAATCTCAAACGAATACCAAGTAAGTGTATTGATTAAATAAAGTCTTAGAAGT
H T I T P N G A V V S B Y D Q H V T Q T N H N Q V S V M I N K V L E V
GTAAAAAATGATTAGGAGTTGCATTAAAGTGGATCTGTAATAGATCAATTAATGCAGCAGTACAAAATACGTTTACAAAATTTAAATACTCAAAAAAAT
L K T V L G V A L S G S V I D Q L T A A V T N T F T N L N T Q K R
GAAGCATGGATTTCTGGGGCAAGGAACTGCCTAATCAAAACAATTACACATACATAGTCTCTGTTGCAATCCAAAATGCCAAAATCGTGGCGGTATGCT
E A N I F W G K E T A N Q T N Y T Y N V L F A I Q N A Q T G G V M
ATGTGTACCAGTGGTGGTTTGAATAAAGTATCAGCAGTAAAGGAACAAGTATTATTTTCACAATTCAGATTTCTGGCAGCTACAAATGTTAATACATCCA
Y C V P V G F E I K V S A V K E Q V L P F T I Q D S A S Y N V R I Q
ATCTTTGAAATTTGCACAACCAATAGTATAGCTCAAGTCAAGTATCCAAATGGCAGATCTACTAGCGCTATTAATGGAAACCTCTAATCTTAGTACGTATAT
S L K F A Q P L V S S S Q Y P I A D L T S A I N G T L \*
TTATTAATAATGGTAATATCAAGATTAATAACTGTGGTATTACCTACCAATCTTAAATATATCCAAAATCATGCGTTAATCTACATTCGCCCTTCTC
CTAAAAATTTGTTCTCACACATCCACATTTTCGA

REFERENCES

(1) Bourgouin, C., Klier, A. & Rapoport, G. (1986) Mol. Gen. Genet. 205,390-397. (2) Earp, D.J., Ward, E.S. & Ellar, D.J. (1987) FEMS Letters (in press). (3) Waalwijk, C., Dulleman, A.M., van Workum, M.E.S. & Visser, B. (1985) Nucleic Acids Res. 13,8207-8217. (4) Ward, E.S. and Ellar, D.J. (1986) J. Mol. Biol. 191,1-11. We are indebted to Dr E.S. Ward for the Bti clone and for advice and Dr C.J. Howe for advice.

Downloaded from https://academic.oup.com/nar/article/15/8/3619/1025409 by guest on 23 April 2024
